# Supplementary material for: A-to-I RNA editing enzyme ADAR2 regulates light-induced circadian phase-shift
Source: PubMed Central journal article supplement (PMC6172258; doi:10.1038/s41598-018-33114-6), 2018-10-04
Supplement: 41598_2018_33114_MOESM1_ESM.pdf [file 41598_2018_33114_MOESM1_ESM.pdf]

## **A-to-I RNA editing enzyme ADAR2 regulates light-induced circadian phase-shift**

Hideki Terajima<sup>1</sup>, Hikari Yoshitane<sup>1</sup>, Tomoko Yoshikawa<sup>2</sup>,  
Yasufumi Shigeyoshi<sup>2</sup> and Yoshitaka Fukada<sup>1,\*</sup>

<sup>1</sup>Department of Biological Sciences, School of Science,  
The University of Tokyo, Hongo 7-3-1, Bunkyo-ku, Tokyo 113-0033, Japan.

<sup>2</sup>Department of Anatomy and Neurobiology, Kindai University Faculty of  
Medicine, Osaka-Sayama City, Osaka 589-8511, Japan.

\*Correspondence should be addressed to:

Dr. Yoshitaka Fukada  
Department of Biological Sciences,  
School of Science, The University of Tokyo,  
Hongo 7-3-1, Bunkyo-ku, Tokyo 113-0033,  
Japan  
Tel: +81-3-5841-4381  
Fax: +81-3-5841-0763  
E-mail: [sfukada@mail.ecc.u-tokyo.ac.jp](mailto:sfukada@mail.ecc.u-tokyo.ac.jp)

Supplementary Material

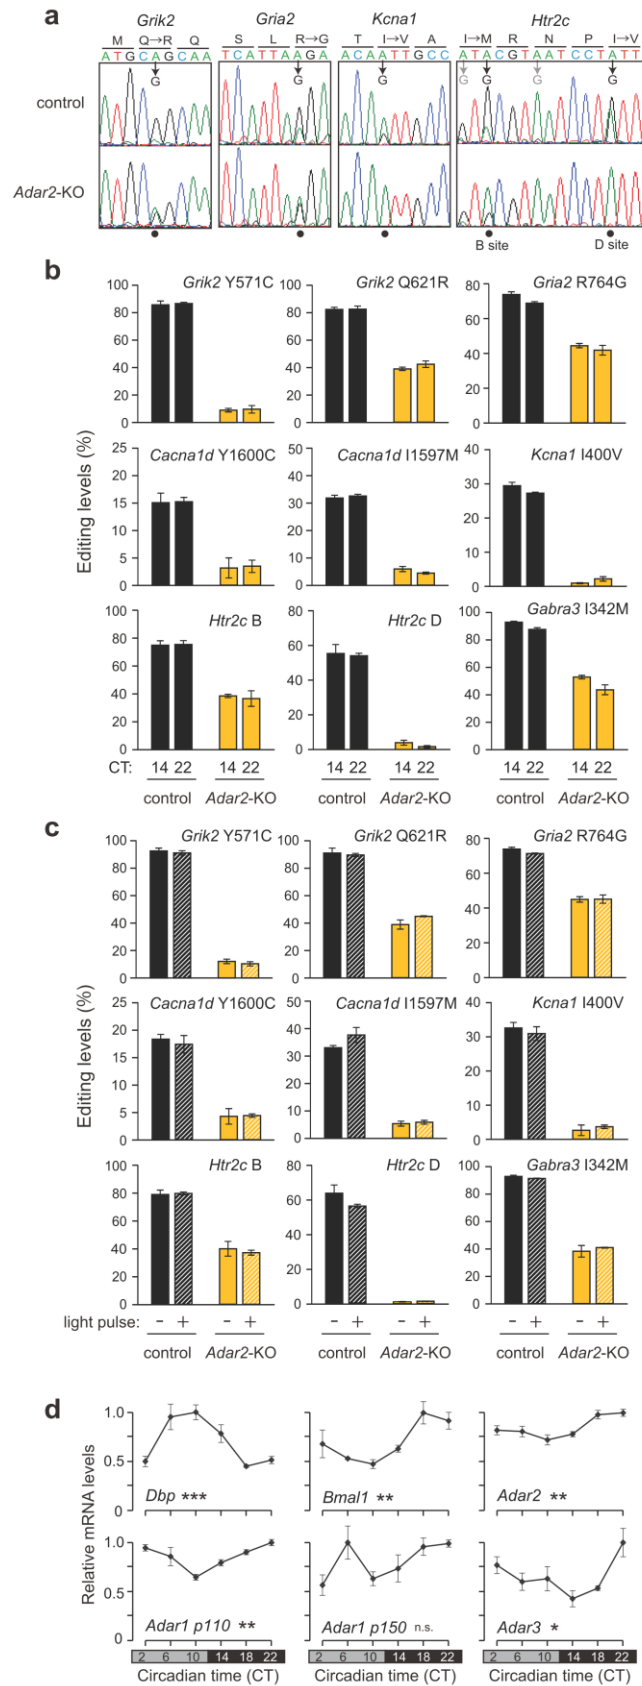

**Supplementary Figure 1 ADAR2-mediated A-to-I RNA editing and temporal expression profiles of Adar family members in mouse SCN punch-out**

(a) Direct sequencing chromatograms from RT-PCR products in control (top) and *Adar2*-KO (bottom) mouse SCN at CT22. The closed circles indicate the editing sites in the transcripts. (b) A-to-I RNA editing levels in direct sequencing analysis at CT14 and CT22 (mean  $\pm$  s.e.m.;  $n = 3$ ). The editing levels at CT22 were reproduced from Fig. 1b. (c) A-to-I RNA editing levels in direct sequencing analysis at CT23 with or without a light pulse (mean  $\pm$  s.e.m.;  $n = 3$ ). A 30-min light pulse was given at CT22 and RNA was extracted from the SCN 30 min after the light pulse. (d) Temporal expression profiles of *Dbp*, *Bmal1*, *Adar2*, *Adar p110*, *Adar p150* and *Adar3* in mouse SCN. mRNA rhythms of *Dbp* and *Bmal1* served as control for circadian rhythm. The signals were normalized to those of *Rps29* (mean  $\pm$  s.e.m.;  $n = 3$ ; \*  $P < 0.05$ , \*\*  $P < 0.01$ , \*\*\*  $P < 0.001$  and n.s.  $P \geq 0.05$  by one-way ANOVA).

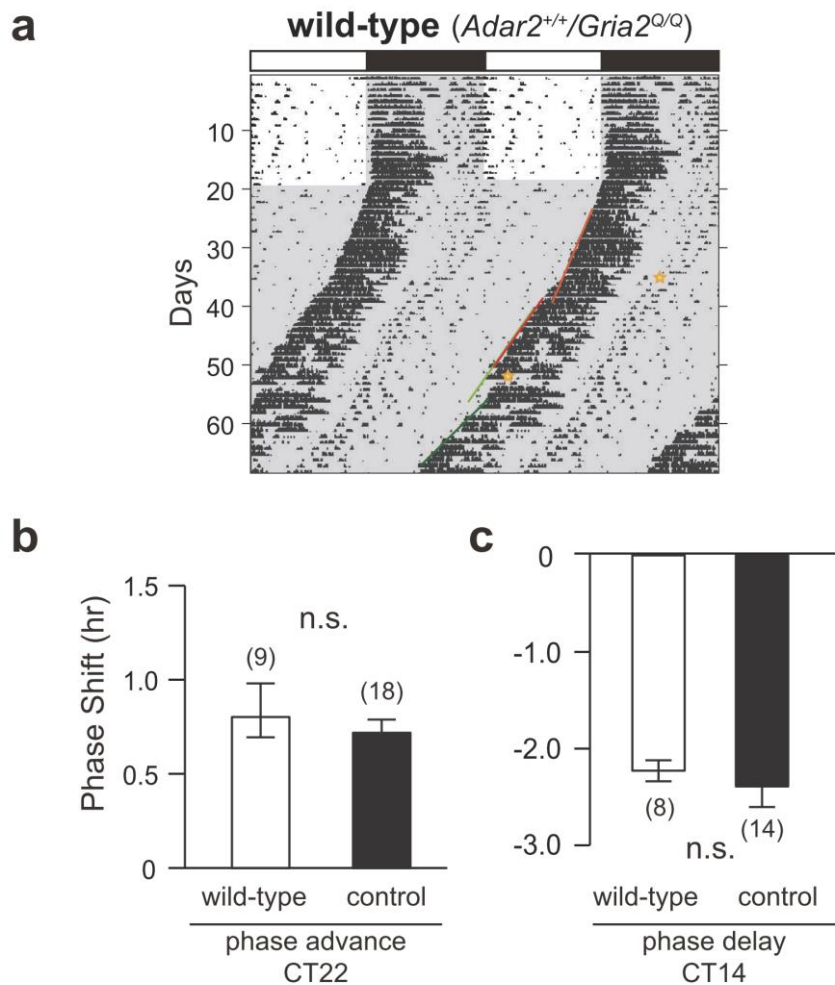

**Supplementary Figure 2 Effects of a light pulse on the circadian phase at two different circadian times in wild-type mice**

(a) Representative double-plotted actograms of wheel-running activity. The area with gray shading indicates the dark period. The light pulses (30 min, 300 lux) indicated by yellow stars were given at CT22 and subsequently given at CT14. The red and green lines indicate the onset of the wheel-running activity used to calculate phase-advance and phase-delay of the activity rhythms, respectively. (b, c) Phase-shifts induced by a light pulse given at CT22 (b) and CT14 (c) (mean  $\pm$  s.e.m.; n.s.  $P \geq 0.05$  by Student's *t*-test). The numbers of animals are indicated in parentheses.

**Supplementary Table1: Gene specific primer sequences**

| primer name  | sequence                  |
|--------------|---------------------------|
| Rps29-Fw     | TGAAGGCAAGATGGGTAC        |
| Rps29-Rv     | GCACATGTTTCAGCCCGTATT     |
| Adar2-Fw     | TTGCCCTGAAGGAGTTTTG       |
| Adar2-Rv     | GAGGGCTTCTTGAAGTGGC       |
| Adar p150-Fw | TCTCAAGGGTTCAGGGGAC       |
| Adar p150-Rv | TACGACTGTGTCTGGTGAGGG     |
| Adar p110-Fw | TTGGGACTAGCCGGGAAG        |
| Adar p110-Rv | TACGACTGTGTCTGGTGAGGG     |
| Adar3-Fw     | AACACTGGCAGGAATCGTC       |
| Adar3-Rv     | TGATACACTTGGTCCCAGAGG     |
| Dbp-Fw       | AATGACCTTTGAACCTGATCCCGCT |
| Dbp-Rv       | GCTCCAGTACTTCTCATCCTTCTGT |
| Bmal1-Fw     | GCAGTGCCACTGACTACCAAGA    |
| Bmal1-Rv     | TCCTGGACATTGCATTGCAT      |
| Grik2-Fw1    | GCTCCACTGGCTATTACCTATG    |
| Grik2-Rv1    | AGCGGTATACGAAGAAATGATG    |
| Grik2-Fw2    | GTTTCGTGAGAAGGTCATCG      |
| Grik2-Rv2    | GTGAAAAACCACCAAATGC       |
| Gria2-Fw1    | TGCAGTGTTTGATAAAATGTGG    |
| Gria2-Rv1    | GATGTAGAATACTCCAGCAACG    |
| Gria2-Fw2    | GACTTATATGAGGAGTGCAGAGC   |
| Gria2-Rv2    | TCAGACTGAGGGCACTGG        |
| Cacna1d-Fw1  | GAACCTGGAGCAAGCTAATG      |
| Cacna1d-Rv1  | TGGTTTGGAGTCTTCTGGC       |
| Cacna1d-Fw2  | CTGGAGCAAGCTAATGAAGAAC    |
| Cacna1d-Rv2  | TGGAGTCTTCTGGCTCGTC       |
| Kcna1-Fw1    | TATGAGGGAGTTAGGGCTGC      |
| Kcna1-Rv1    | TGATAGTAGAGGAGCTGCGG      |
| Kcna1-Fw2    | GGGCTGCTCATCTTTTTCC       |
| Kcna1-Rv2    | CTGAGGTCAGTGCAGAGGC       |
| Htr2c-Fw1    | GGCCAGCACTTTCAATAGTCGTG   |
| Htr2c-Rv1    | CAATCTTCATGATGGCCTTAGTCC  |
| Htr2c-Fw2    | ATGACAATAGGGGGCAAC        |
| Htr2c-Rv2    | TTCATGATGGCCTTAGTCC       |
| Gabra3-Fw1   | ATGACAACCCACTTTCATCTG     |
| Gabra3-Rv1   | CCTCTGGTACCTTCTTGCC       |
| Gabra3-Fw2   | TCATCTGAAGAGAAAAATTGGC    |
| Gabra3-Rv2   | CTGGTACCTTCTTGCCCTCC      |
